# Supplementary material
Source: Elsevier journal article supplement (https://www.sciencedirect.com/science/article/pii/S1576988720300455)
Supplement: mmc1 [file S1576988720300455:mmc1.doc]

**COLLEGED TEST ABOUT IMMUNIZATION AGAINST TUBERCULOSIS**

**(FRAGMENT)**

**Presentation:** This test is to collect information useful to detect improve opportunities in the Studies plan of Medicine Bachelor’s Degree from Universidad Guadalajara LAMAR, about “Immunization against tuberculosis” by the institutional authorities. Accordingly, the score obtained by you doesn’t have effect on your qualifications, credits or curricular advance.

**Instructions:** Following you will find a series of statements formulated as affirmations with the answer options “true”, “false” and “I don’t know””. Circle the words “true” or “false” as you see fit, or “I don’t know” when you are not sure of the answer.

**Age:** [_____] years-old **Gender:** [_] Female [_] Male **Groups:** [____] semester

1. **The BCG vaccine must be received at birth.**

True False I don’t know

1. **The BCG vaccine booster is applied at any age before 5 years.**

True False I don’t know

1. **During the control of the healthy child, the missing doses of BCG should be investigated.**

True False I don’t know

1. **The BCG vaccine is given only once.**

True False I don’t know

1. **BCG vaccine produces postvaccination reaction.**

True False I don’t know

1. **During disease consultations, inquire about missing doses of BCG.**

True False I don’t know

1. **BCGitis is an adverse effect to BCG vaccination.**

True False I don’t know

1. **BCG vaccination can cause lethal disseminated infections.**

True False I don’t know

1. **BCG vaccine should not be applied to HIV-positive children.**

True False I don’t know

1. **Ice should be placed on the BCG vaccination site to mitigate local inflammation.**

True False I don’t know
